# Supplementary material for: Efficient resolution of racemic N-benzyl β3-amino acids by iterative liquid–liquid extraction with a chiral (salen)cobalt(iii) complex as enantioselective selector
Source: Royal Society of Chemistry journal article supplement (doi:10.1039/b711477j), 2007-01-01
Supplement: b711477j.pdf [file b711477j.pdf]

*Electronic Supporting Information*

**Efficient Resolution of Racemic *N*-Benzyl  $\beta^3$ -Amino Acids by Iterative Liquid-Liquid  
Extraction with a Chiral (Salen)Cobalt(III) Complex as Enantioselective Selector**

Pawel Dzygiel,<sup>a</sup> Chiara Monti,<sup>a</sup> Umberto Piarulli\*<sup>b</sup> and Cesare Gennari\*<sup>a</sup>

<sup>a</sup> *Dipartimento di Chimica Organica e Industriale, Centro di Eccellenza C.I.S.I.,  
Università degli Studi di Milano, Via G. Venezian, 21, 20133 Milano, Italy*

<sup>b</sup> *Dipartimento di Scienze Chimiche e Ambientali, Università degli Studi dell'Insubria,  
Via Valleggio, 11, 22100 Como, Italy*

**(*rac*)-3-Benzylamino-3-phenylpropionic acid (*N*-benzyl- $\beta^3$ -Homophenylglycine - *N*-Bn- $\beta^3$ -hPhg).**

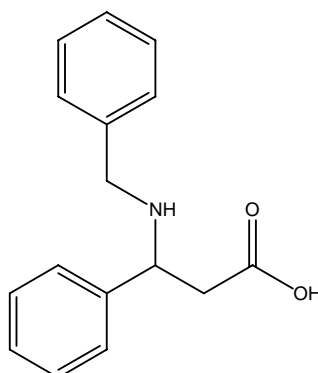

*N*-Bn- $\beta^3$ -hPhg (HPLC trace of a racemic solution of *N*-Bn- $\beta^3$ -hPhg)

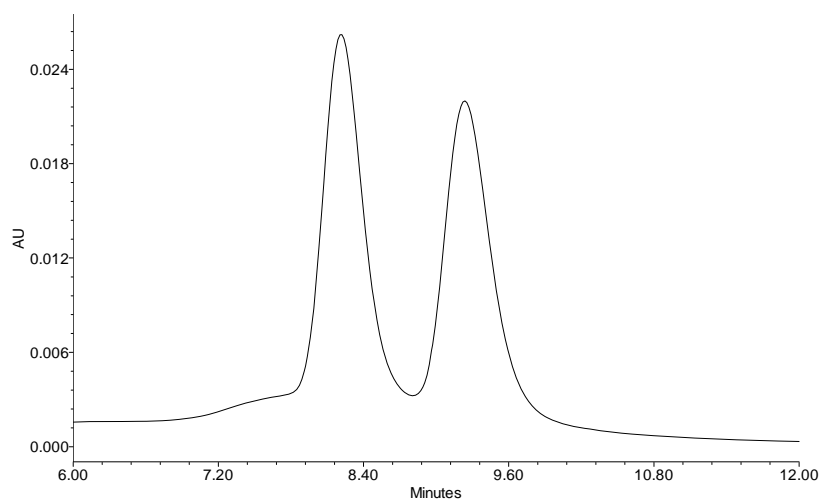

*N*-Bn- $\beta^3$ -hPhg ( $^1\text{H-NMR}$ ,  $\text{D}_2\text{O-NaOH}$ )

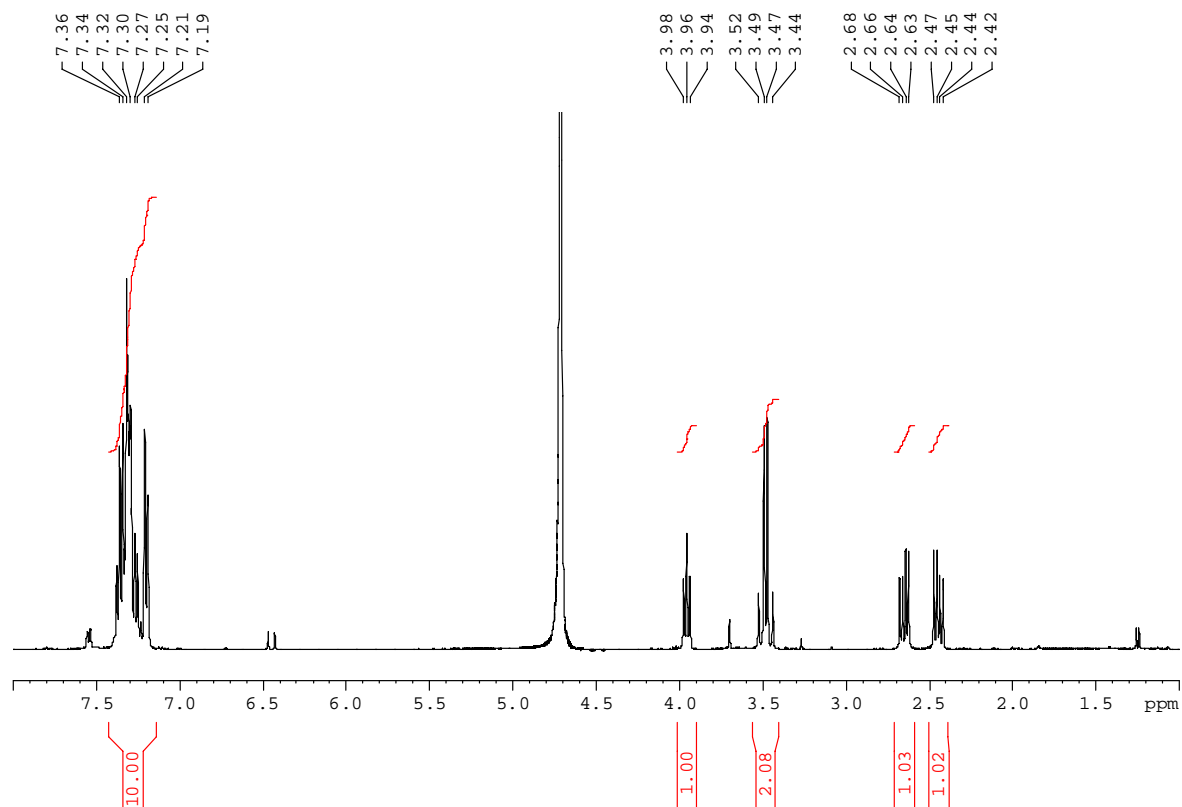

*N*-Bn- $\beta^3$ -hPhg ( $^{13}\text{C-NMR}$ ,  $\text{D}_2\text{O-NaOH}$ )

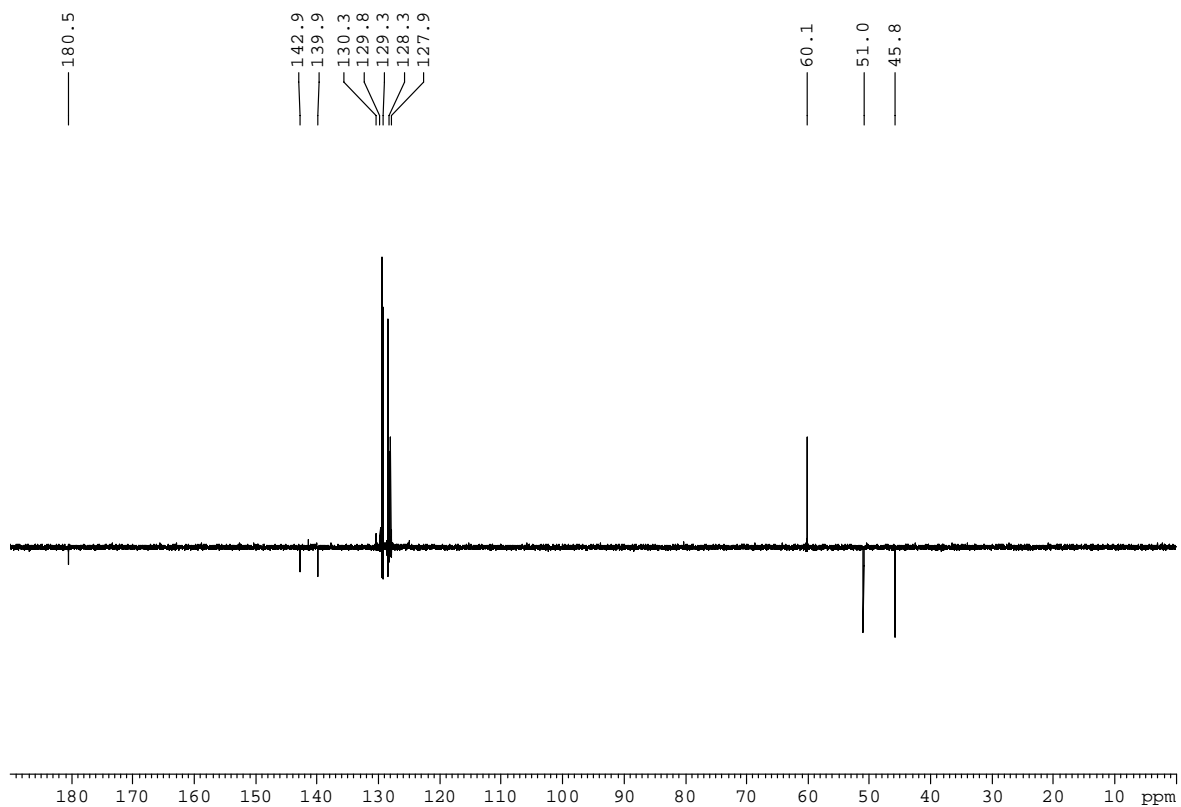

**(rac)-3-Benzylaminobutyric acid (*N*-benzyl- $\beta^3$ -homoalanine - *N*-Bn- $\beta^3$ -hAla).**

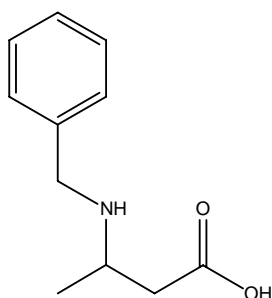

*N*-Bn- $\beta^3$ -hAla (HPLC trace of a racemic solution of *N*-Bn- $\beta^3$ -hAla)

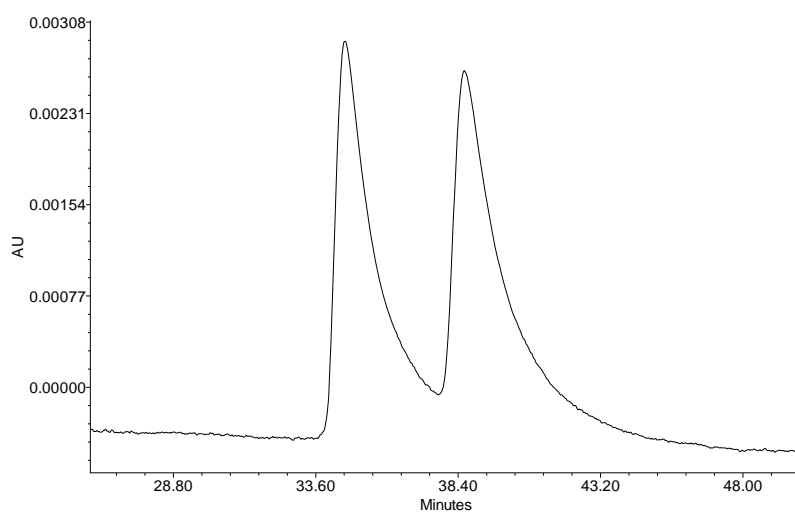

*N*-Bn- $\beta^3$ -hAla ( $^1\text{H-NMR}$ ,  $\text{D}_2\text{O}$ )

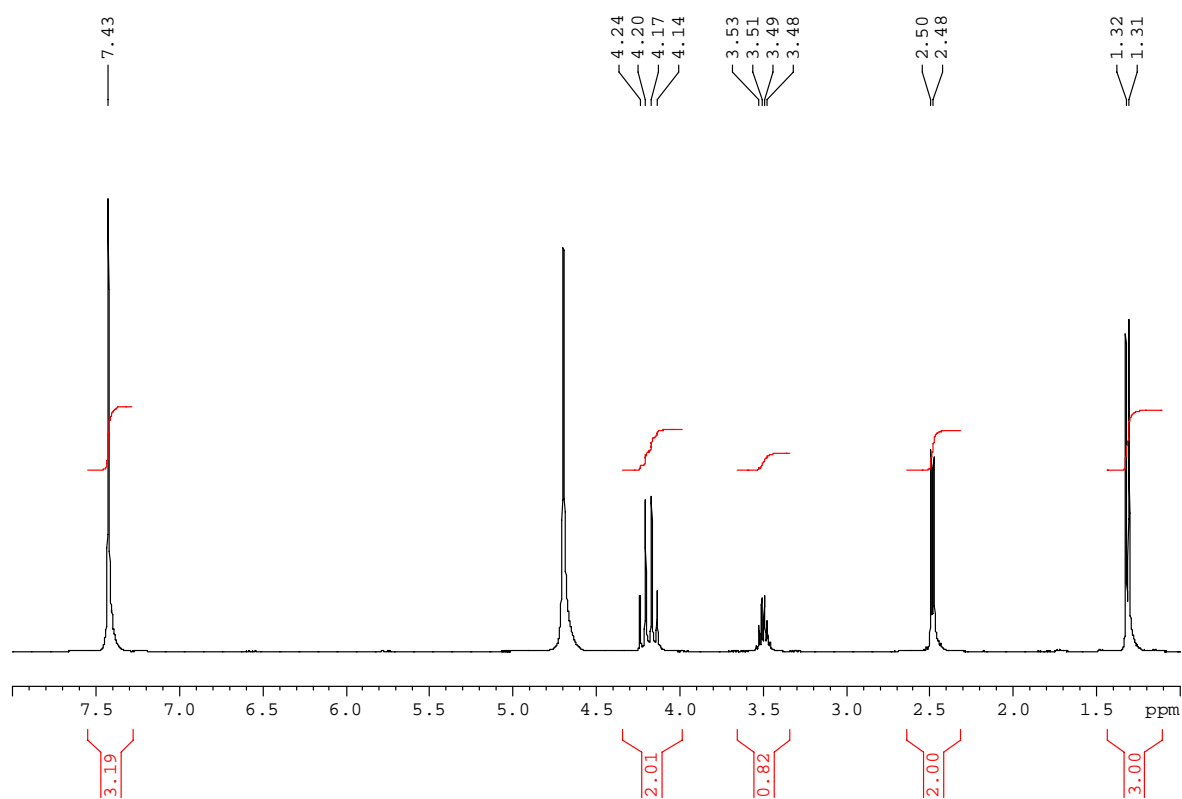

*N*-Bn- $\beta^3$ -hAla ( $^{13}\text{C-NMR}$ ,  $\text{D}_2\text{O}$ )

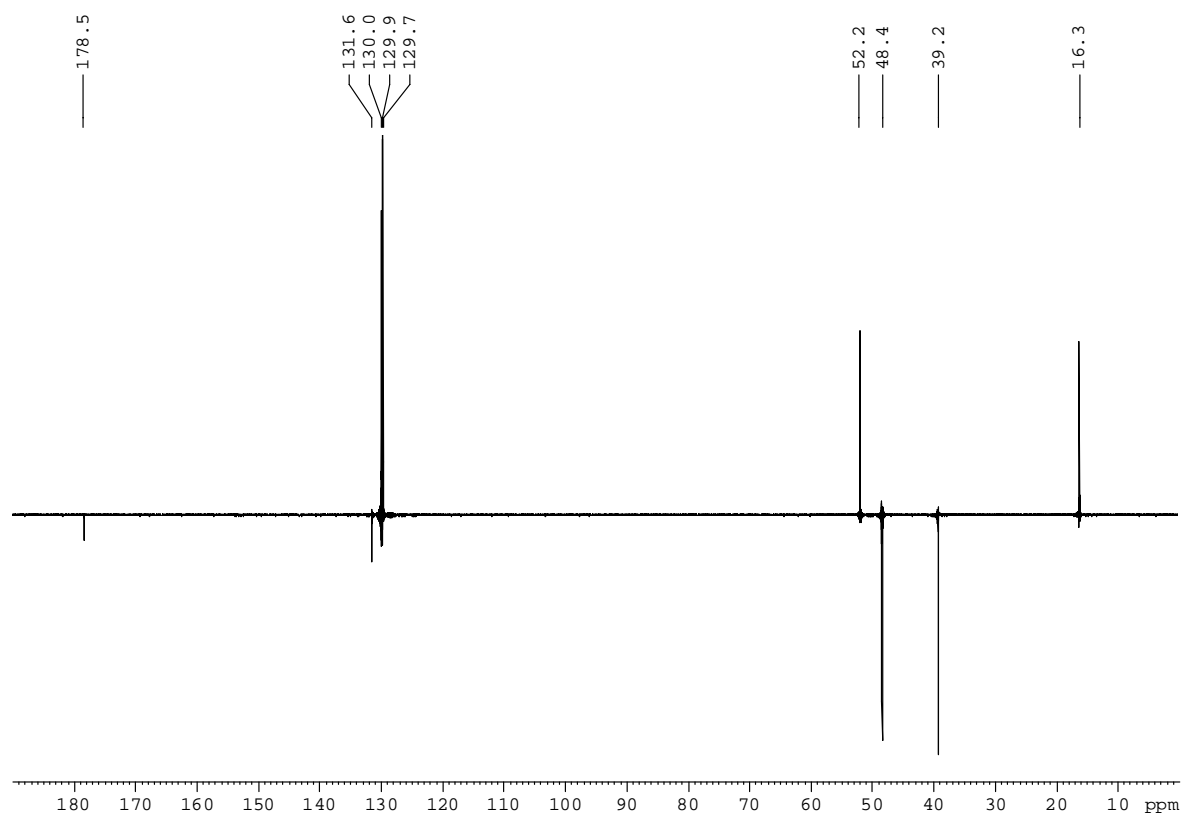

**(rac)-3-Benzylamino-4-methyl pentanoic acid (*N*-benzyl- $\beta^3$ -Homovaline - *N*-Bn- $\beta^3$ -hVal).**

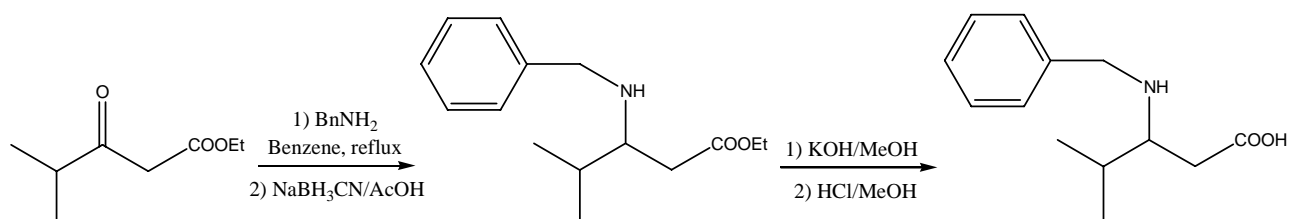

*N*-Bn- $\beta^3$ -hVal (HPLC trace of a racemic solution of *N*-Bn- $\beta^3$ -hVal)

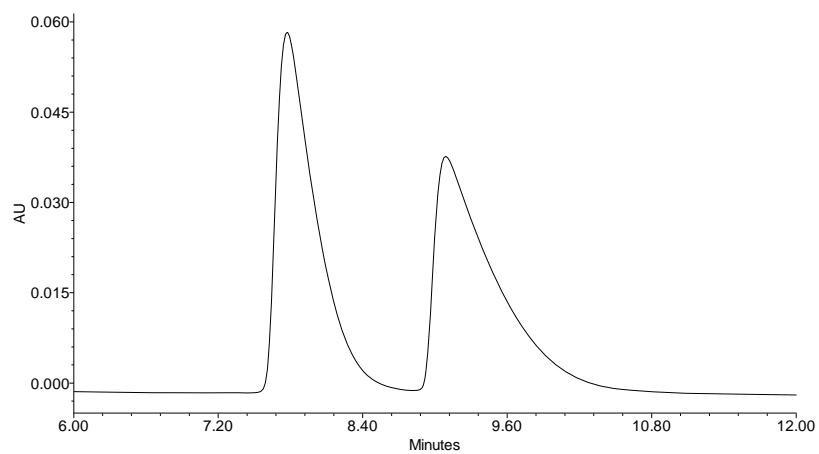

*N*-Bn- $\beta^3$ -hVal ( $^1\text{H-NMR}$ ,  $\text{D}_2\text{O}$ )

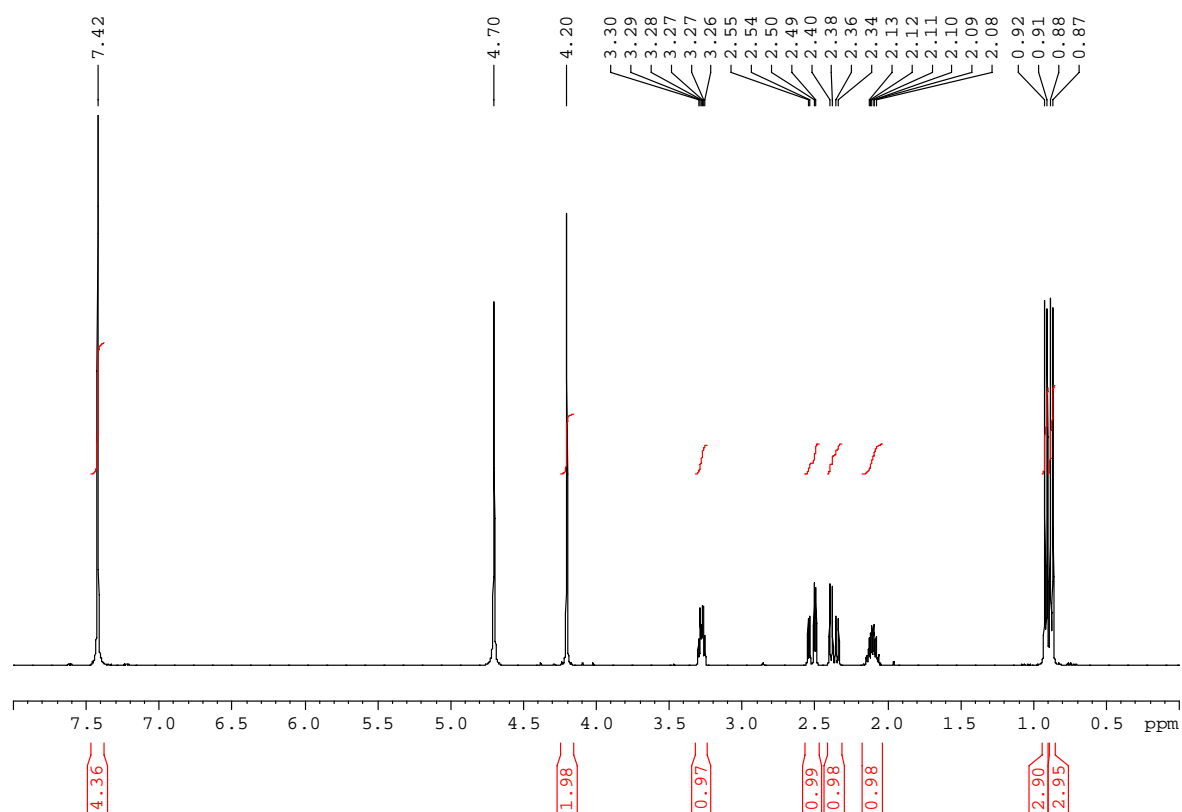

*N*-Bn- $\beta^3$ -hVal ( $^{13}\text{C-NMR}$ ,  $\text{D}_2\text{O}$ )

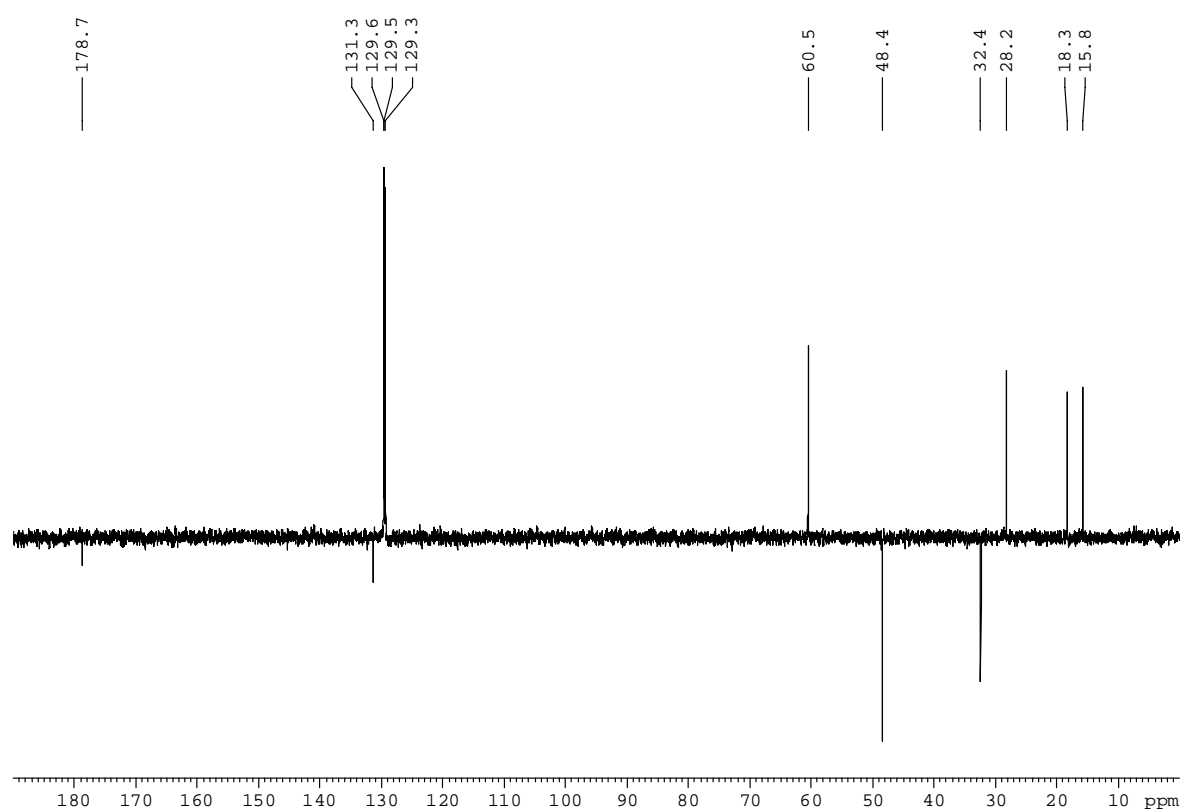

### Extraction/separation Scheme

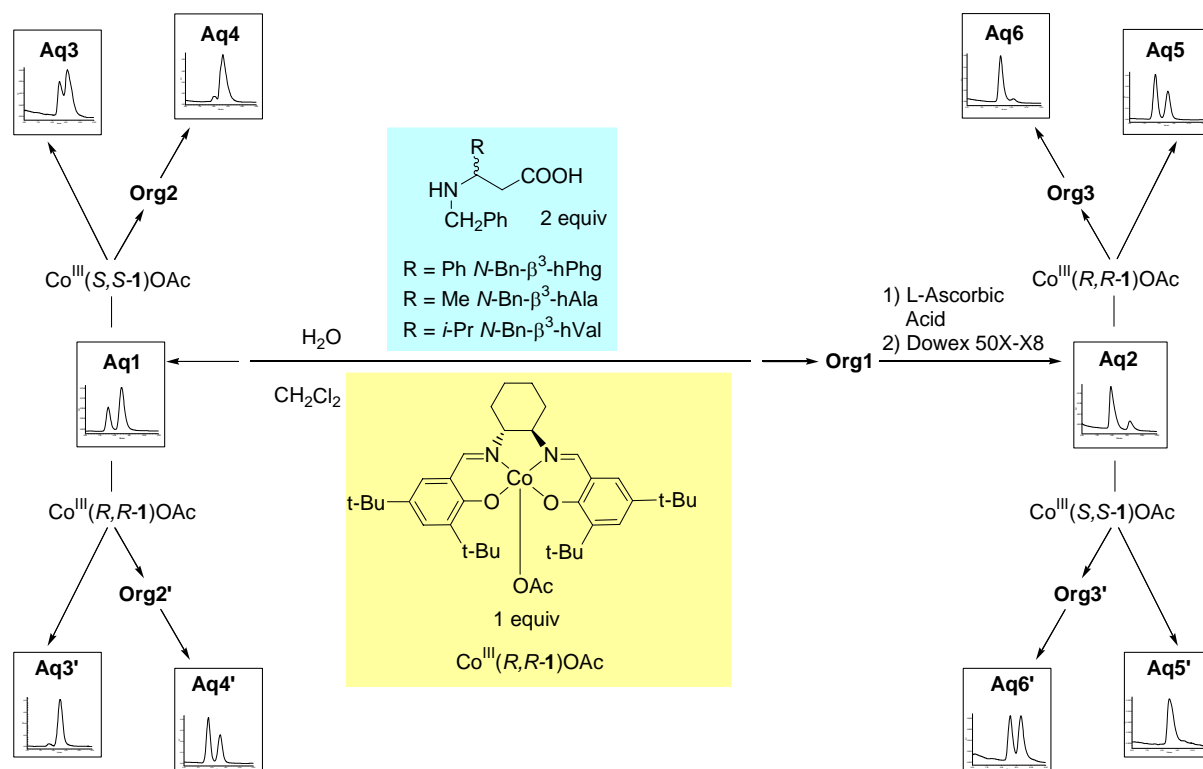

### Extraction of *N*-Bn- $\beta^3$ -hPhg.

$^1\text{H-NMR}$  spectrum in  $\text{CDCl}_3$  of  $(R,R)$ - $[\text{Co}^{\text{III}}(\mathbf{1})(N\text{-Bn-}\beta^3\text{-hPhg})]$  obtained from Org1

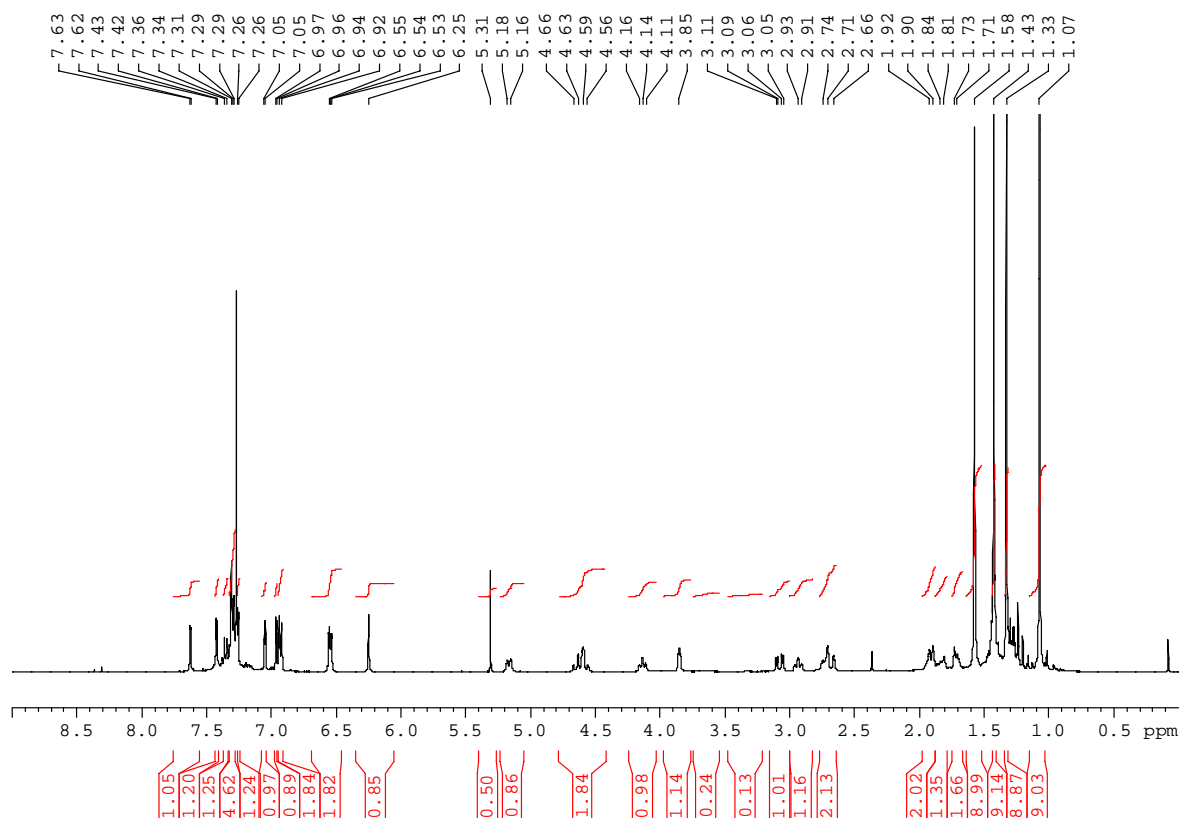

$^{13}\text{C-NMR}$  spectrum in  $\text{CDCl}_3$  of  $(R,R)$ - $[\text{Co}^{\text{III}}(\mathbf{1})(N\text{-Bn-}\beta^3\text{-hPhg})]$  obtained from Org1

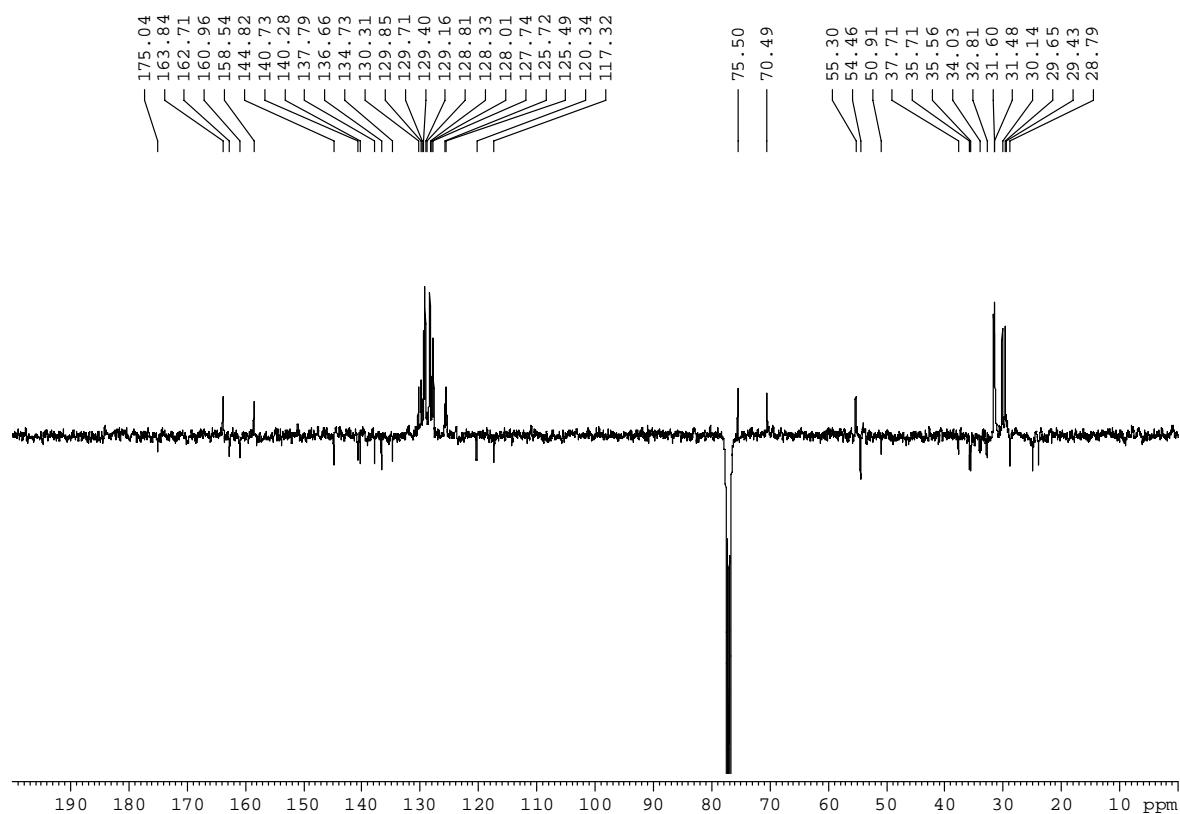



HPLC trace of the *N*-Bn- $\beta^3$ -hPhg solution (Aq4) obtained after the second extraction of *N*-Bn- $\beta^3$ -hPhg with (*S,S*)-[Co<sup>III</sup>(**1**)(OAc)] and cleavage with ascorbic acid ( $t_r$  = 8.5 min, *S* enantiomer;  $t_r$  = 9.4 min, *R* enantiomer; 90% ee).

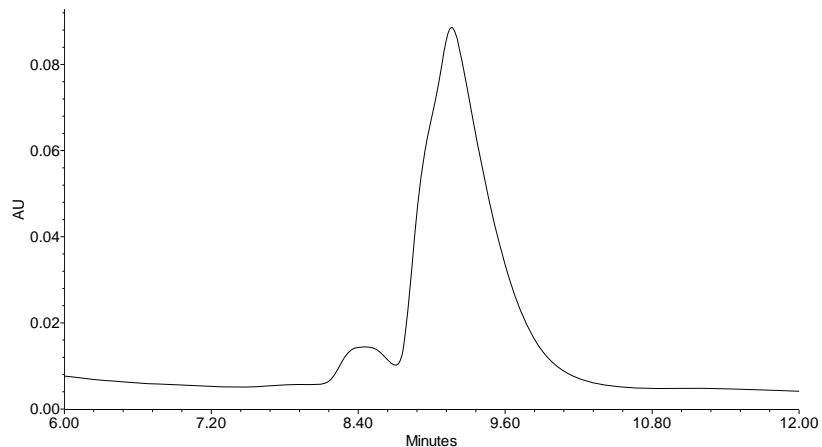

HPLC trace of the solution of *N*-Bn- $\beta^3$ -hPhg (Aq6) obtained from the organic phase (Org3) following the second extraction of *N*-Bn- $\beta^3$ -hPhg with (*R,R*)-[Co<sup>III</sup>(**1**)(OAc)] and cleavage with ascorbic acid ( $t_r$  = 8.6 min, *R* enantiomer;  $t_r$  = 9.4 min, *S* enantiomer; 90% ee).

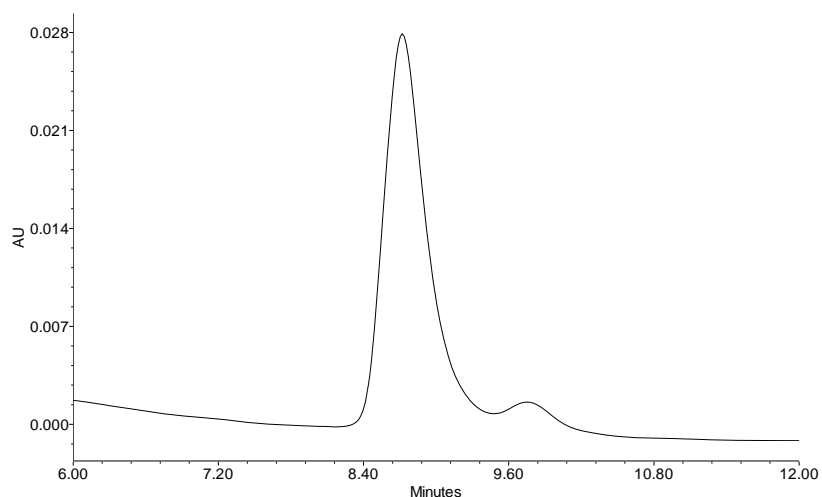

$^1\text{H-NMR}$  spectra in  $\text{CDCl}_3$  of  $(R,R)$ - $[\text{Co}^{\text{III}}(\mathbf{1})(N\text{-Bn-}\beta^3\text{-hPhg})]$  obtained from Org2'.

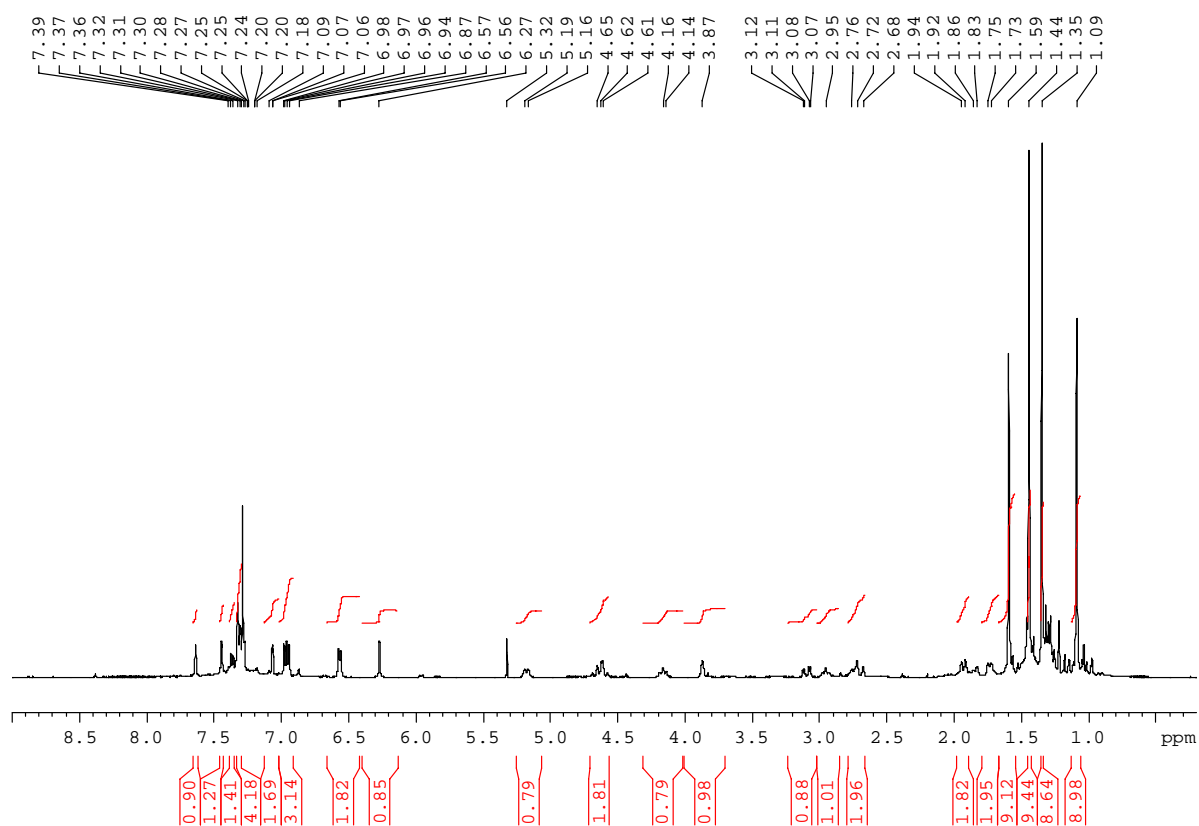

$^{13}\text{C-NMR}$  spectra in  $\text{CDCl}_3$  of  $(R,R)$ - $[\text{Co}^{\text{III}}(\mathbf{1})(N\text{-Bn-}\beta^3\text{-hPhg})]$  obtained from Org2'.

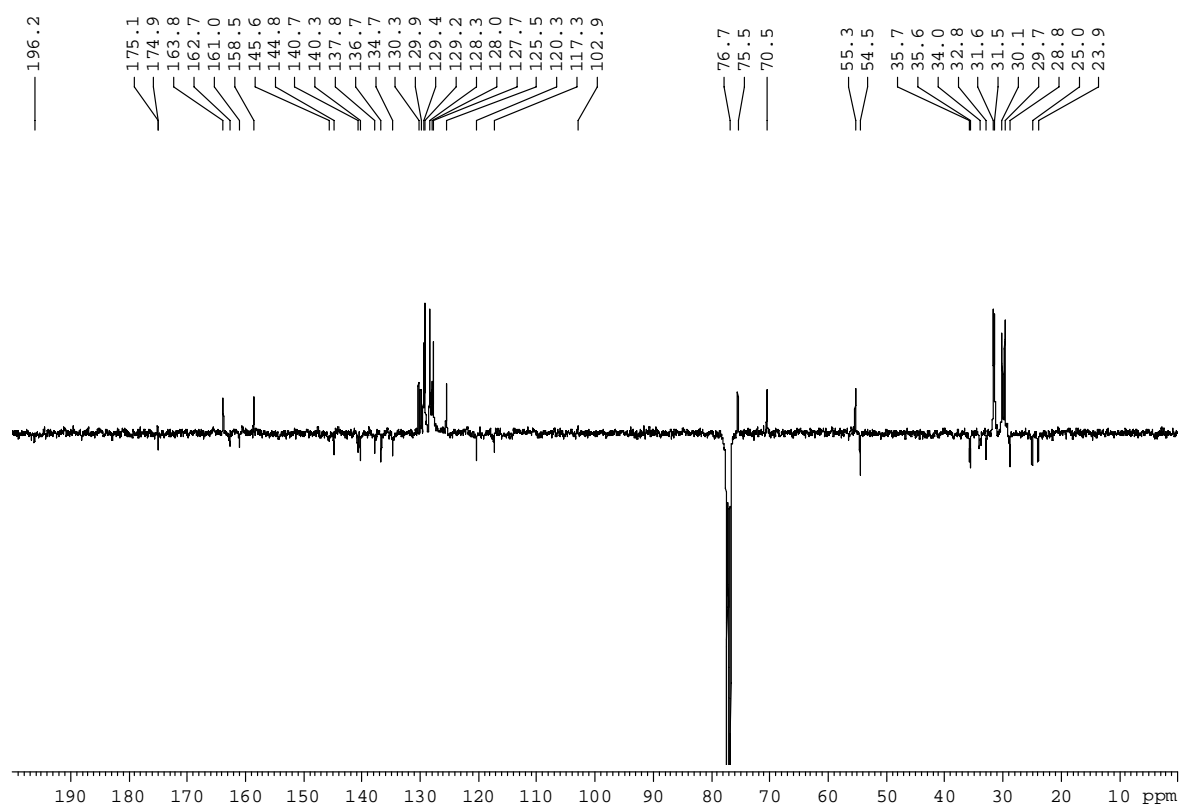

HPLC trace of the aqueous phase (Aq3') following the second extraction of *N*-Bn- $\beta^3$ -hPhg with (*R,R*)-[Co<sup>III</sup>(**1**)(OAc)] ( $t_r$  = 8.1 min, *S* enantiomer;  $t_r$  = 9.1 min, *R* enantiomer; 93% ee).

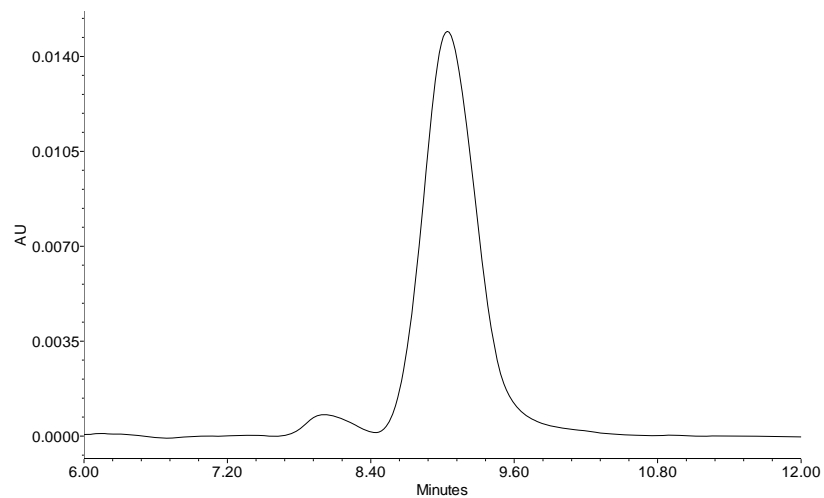

<sup>1</sup>H-NMR spectra in CDCl<sub>3</sub> of (*S,S*)-[Co<sup>III</sup>(**1**)(*N*-Bn- $\beta^3$ -hPhg)] obtained from Org3'.

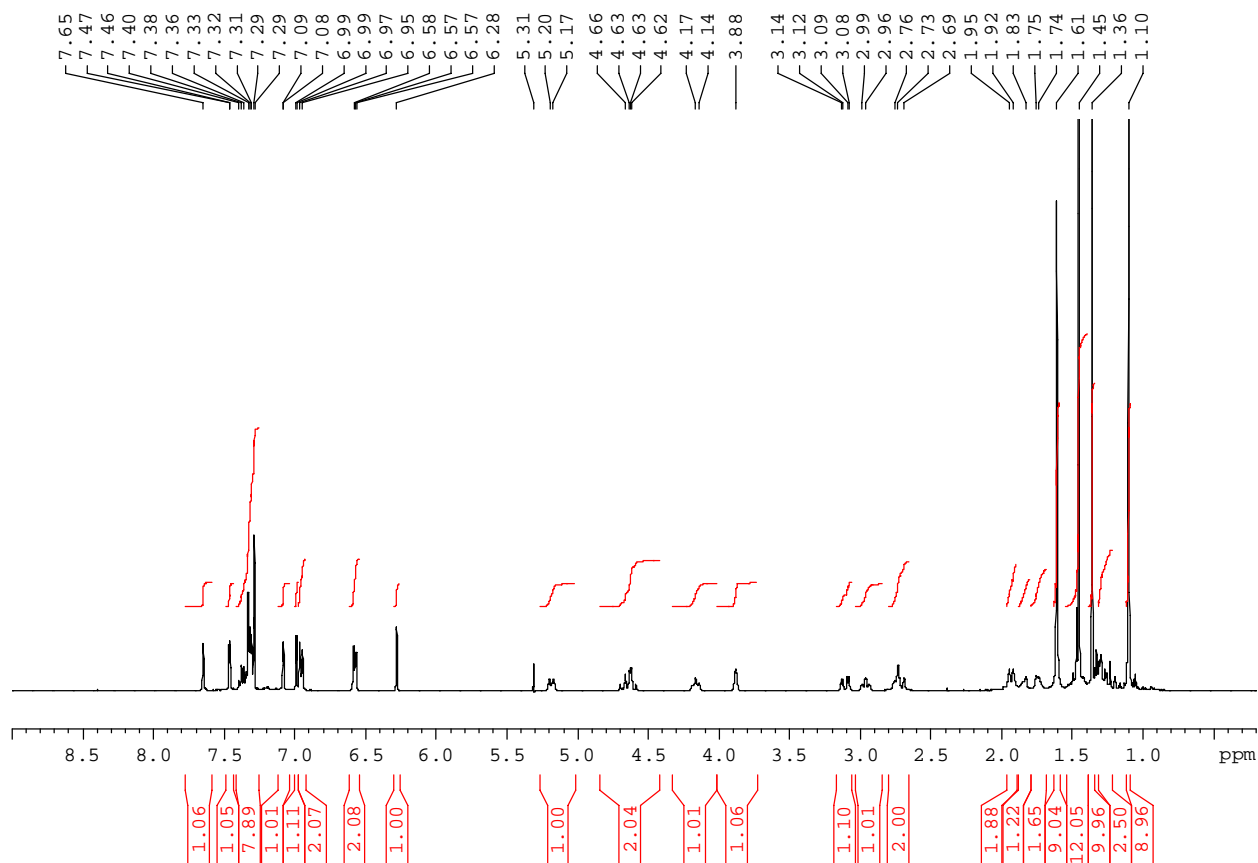

$^{13}\text{C}$ -NMR spectra in  $\text{CDCl}_3$  of  $(S,S)$ - $[\text{Co}^{\text{III}}(\mathbf{1})(N\text{-Bn-}\beta^3\text{-hPhg})]$  obtained from Org3'.

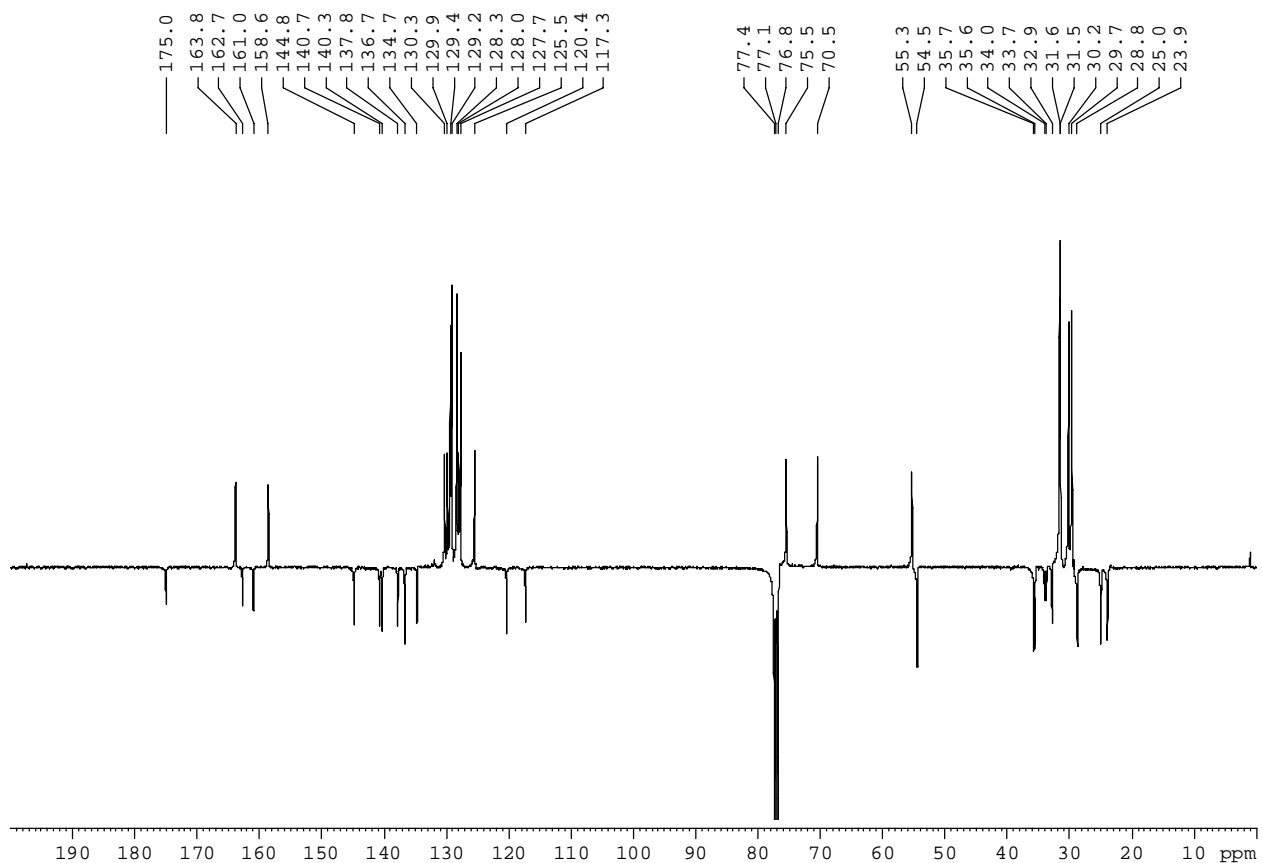

HPLC trace of the aqueous phase (Aq5') following the second extraction of  $N\text{-Bn-}\beta^3\text{-hPhg}$  with  $(S,S)$ - $[\text{Co}^{\text{III}}(\mathbf{1})(\text{OAc})]$  ( $t_r = 8.5$  min,  $S$  enantiomer;  $t_r = 9.7$  min,  $R$  enantiomer; 93% ee).

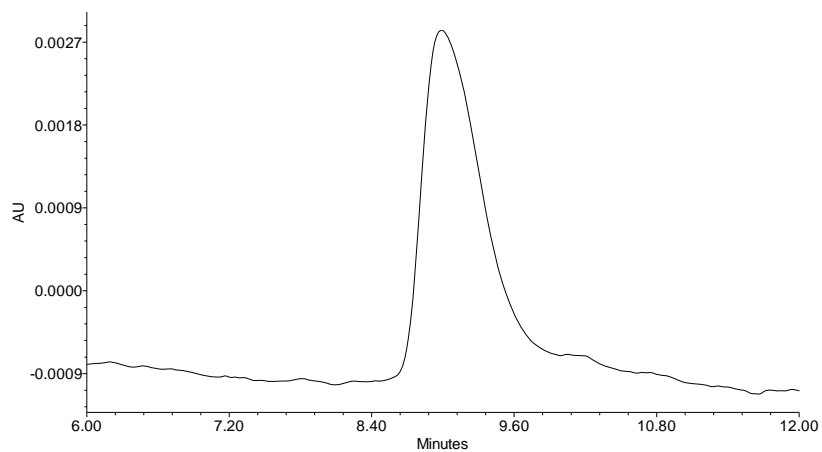

### Extraction of *N*-Bn- $\beta^3$ -hAla.

HPLC trace of the *N*-Bn- $\beta^3$ -hAla solution (Aq4) following the second extraction of *N*-Bn- $\beta^3$ -hAla with (*S,S*)-[Co<sup>III</sup>(**1**)(OAc)] ( $t_r$  = 37.0 min, *R* enantiomer;  $t_r$  = 40.5 min, *S* enantiomer; 88% ee).

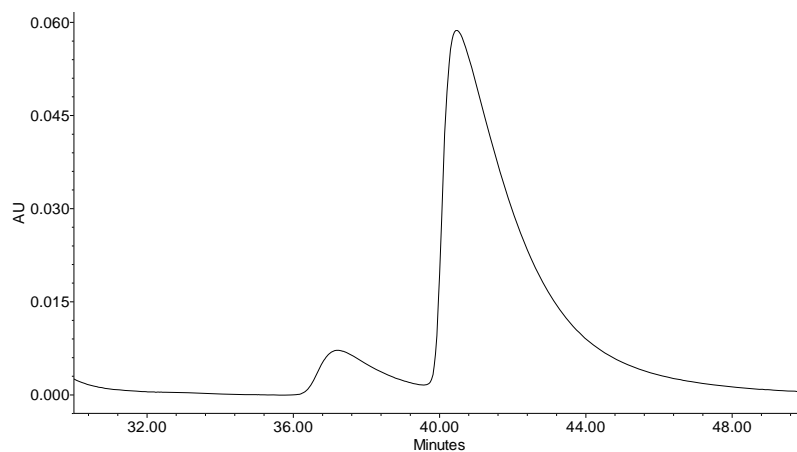

HPLC trace of the solution of *N*-Bn- $\beta^3$ -hAla (Aq6) following the second extraction of *N*-Bn- $\beta^3$ -hAla with (*R,R*)-[Co<sup>III</sup>(**1**)(OAc)] ( $t_r$  = 35.1 min, *R* enantiomer;  $t_r$  = 40.8 min, *S* enantiomer; 90% ee).

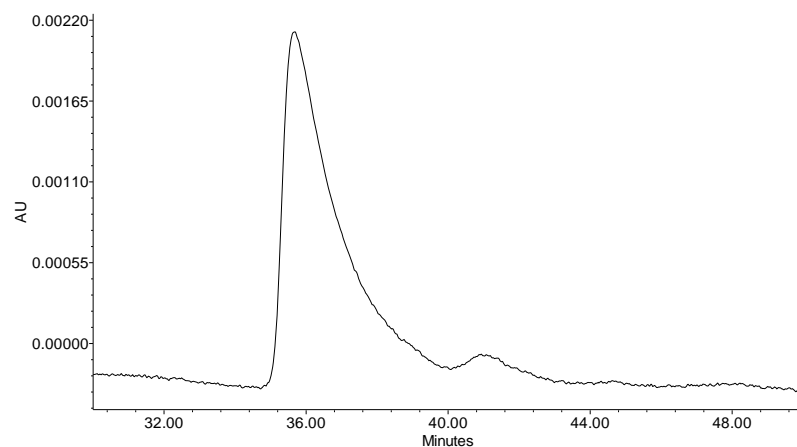

HPLC trace of the aqueous phase (Aq3') following the second extraction of *N*-Bn- $\beta^3$ -hAla with (*R,R*)-[Co<sup>III</sup>(**1**)(OAc)] ( $t_r$  = 33.5 min, *R* enantiomer;  $t_r$  = 37.1 min, *S* enantiomer; 36% ee).

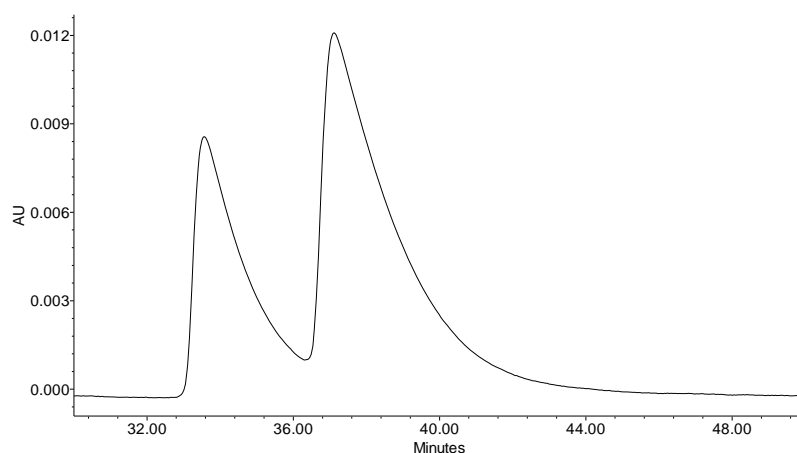

HPLC trace of the aqueous phase (Aq5') following the second extraction of *N*-Bn- $\beta^3$ -hAla with (*S,S*)-[Co<sup>III</sup>(**1**)(OAc)] ( $t_r$  = 33.2 min, *R* enantiomer;  $t_r$  = 38.1 min, *S* enantiomer; 83% ee).

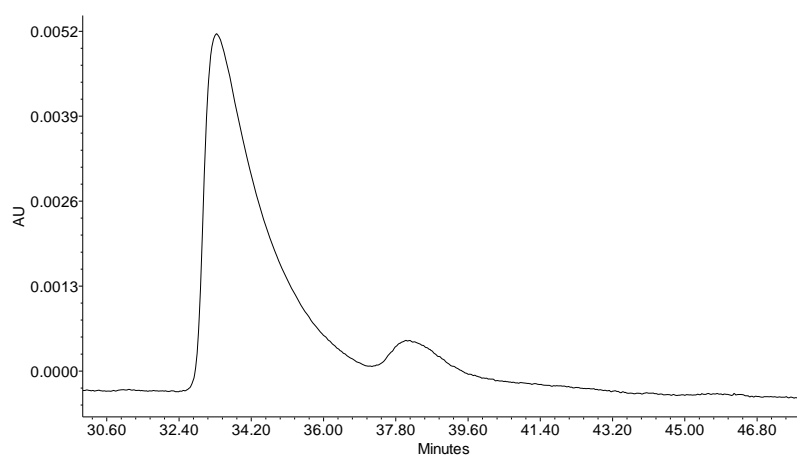

### Extraction of *N*-Bn- $\beta^3$ -hVal.

HPLC trace of the *N*-Bn- $\beta^3$ -hVal solution (Aq4) following the second extraction of *N*-Bn- $\beta^3$ -hVal with (*S,S*)-[Co<sup>III</sup>(**1**)(OAc)] [ $t_r$  = 7.5 min, (+) enantiomer;  $t_r$  = 9.3 min, (-) enantiomer; 90% ee]

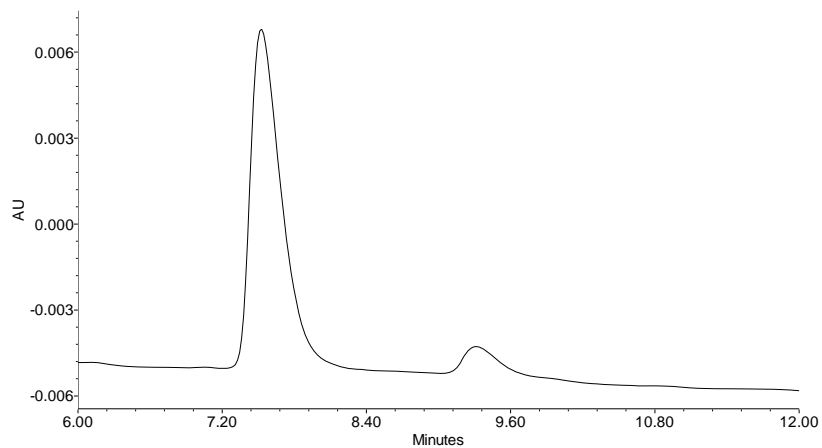

HPLC trace of the solution of *N*-Bn- $\beta^3$ -hVal (Aq6) following the second extraction of *N*-Bn- $\beta^3$ -hVal with (*R,R*)-[Co<sup>III</sup>(**1**)(OAc)] [ $t_r$  = 7.7 min, (+) enantiomer;  $t_r$  = 9.0 min, (-) enantiomer; 93% ee].

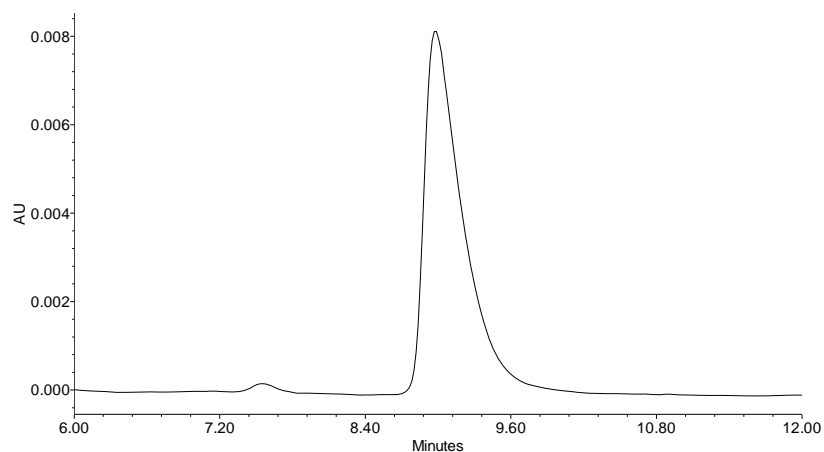

HPLC trace of the *N*-Bn- $\beta^3$ -hVal solution (Aq3') following the second extraction of *N*-Bn- $\beta^3$ -hVal with (*R,R*)-[Co<sup>III</sup>(**1**)(OAc)] [*t*<sub>r</sub> = 7.8 min, (+) enantiomer; *t*<sub>r</sub> = 9.8 min, (-) enantiomer; 80% ee]

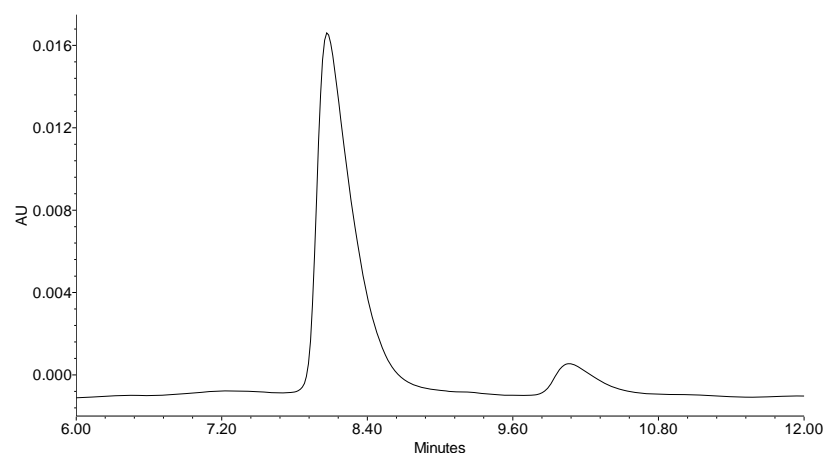

HPLC trace of the solution of *N*-Bn- $\beta^3$ -hVal (Aq5') following the second extraction of *N*-Bn- $\beta^3$ -hVal with (*S,S*)-[Co<sup>III</sup>(**1**)(OAc)] [*t*<sub>r</sub> = 7.3 min, (+) enantiomer; *t*<sub>r</sub> = 8.4 min, (-) enantiomer; 92% ee].

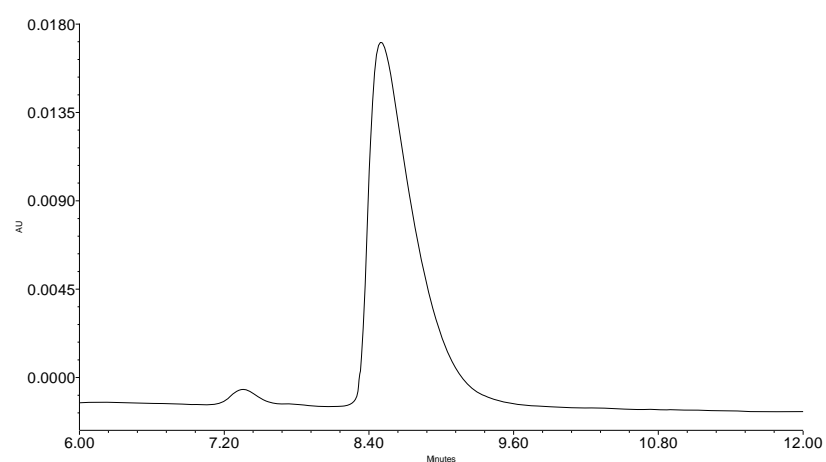

Attribution of the absolute configuration to *N*-Bn- $\beta^3$ -hVal: by analogy with the complexation selectivity shown for *N*-Bn- $\beta^3$ -hPhg and *N*-Bn- $\beta^3$ -hAla, we attribute to (+)-*N*-Bn- $\beta^3$ -hVal the (*R*) absolute configuration:  $[\alpha]_D^{24} = +35.6$ , *c* 0.80 in MeOH, 100% ee in favour of (*R*)-enantiomer.
